# Supplementary figures and images for: A high-throughput and high peak capacity narrow-bore parallel segmented flow column strategy for the liquid chromatography-tandem mass spectrometry analysis of organic contaminants in water
Source: Royal Society of Chemistry journal article supplement (doi:10.1039/c9ay02370d), 2019-12-23

Intensity, cps

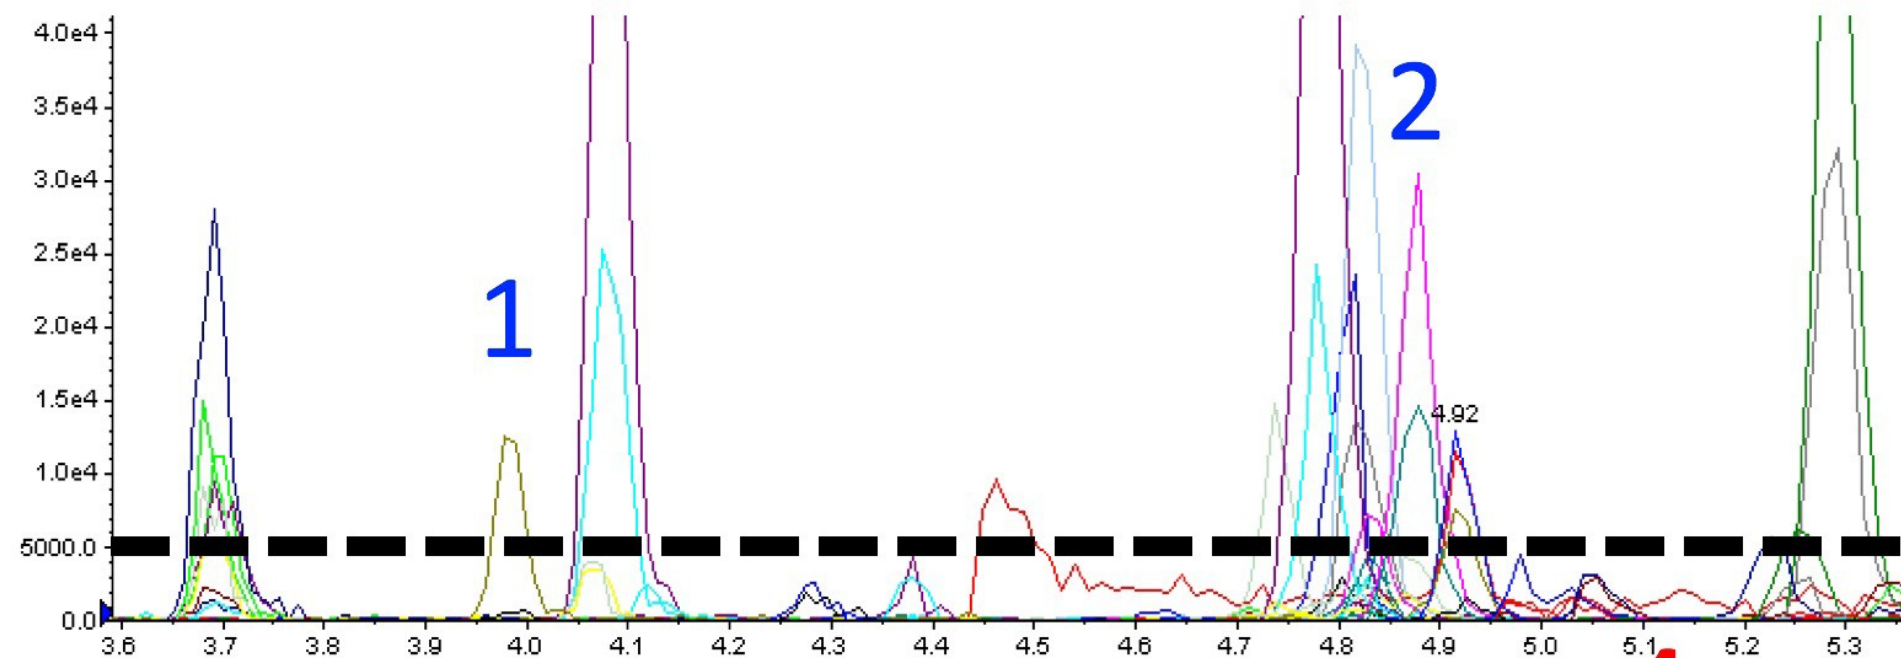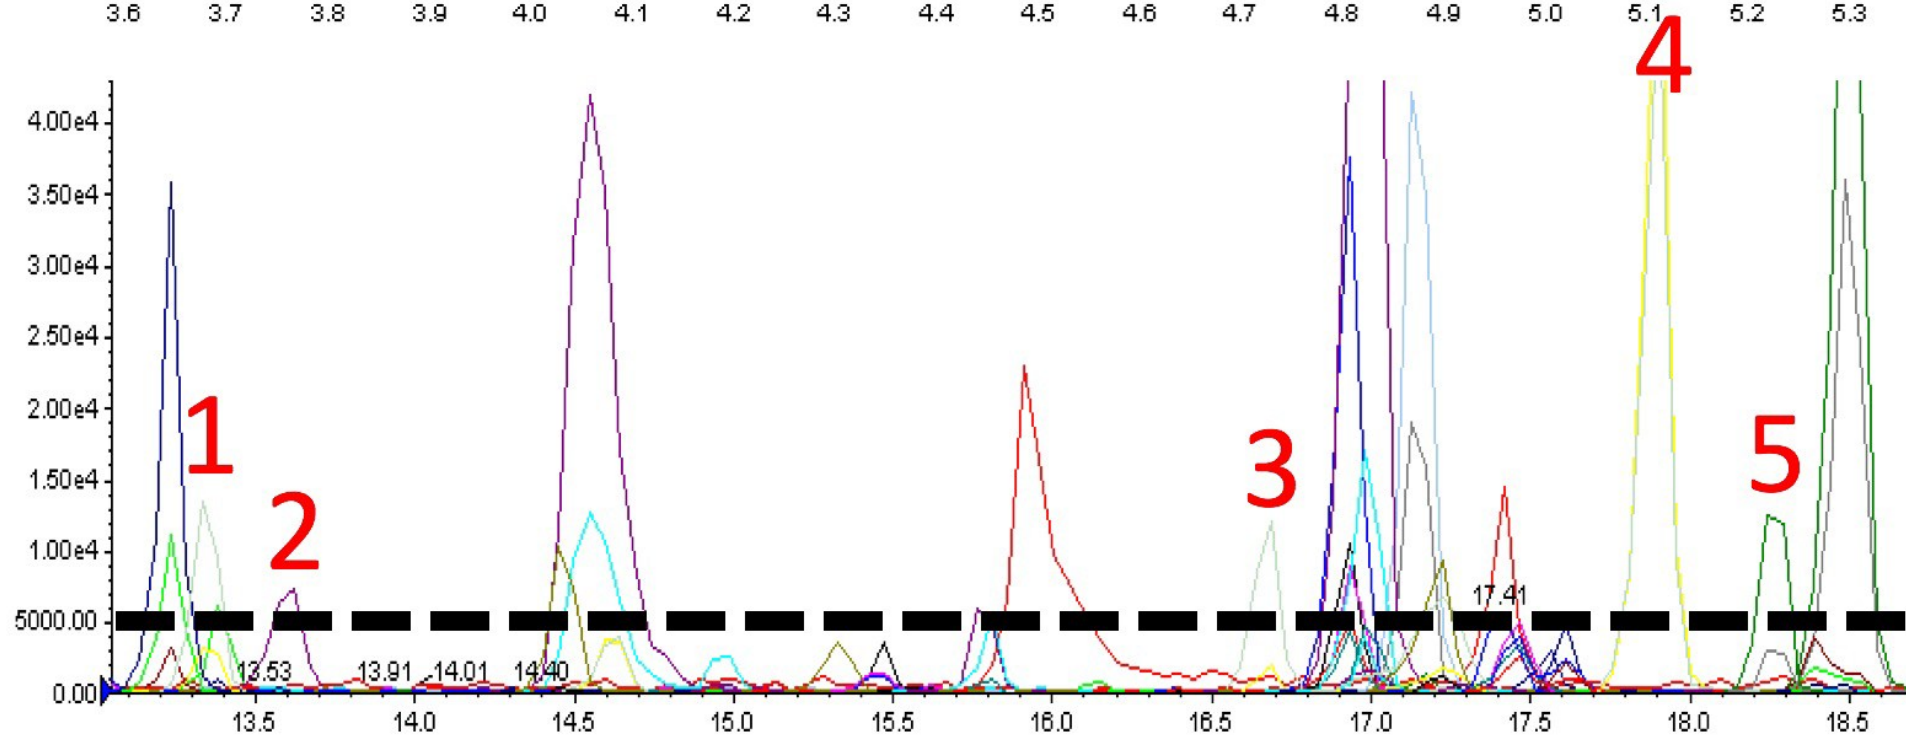

Time (min)

Supplement: c9ay02370d1.pdf [file c9ay02370d1.pdf]
